# Supplementary material
Source: PubMed Central journal article supplement (PMC6451559)
Supplement: ejhpharm-2016-001017supp001.pdf [file ejhpharm-2016-001017supp001.pdf]

## Annex 1

**Sender**

**Country:**

**Subject**

Implementation of the Resolution on quality and safety assurance requirements for medicinal products prepared in pharmacies for the special needs of patients.

### Questionnaire

Some clarifying remarks concerning the XX regulation for pharmacy preparations in your country:

| Resolution text                                                    | question                                                                                                                                                                                       | Comments |
|--------------------------------------------------------------------|------------------------------------------------------------------------------------------------------------------------------------------------------------------------------------------------|----------|
| 3.1. (pharmaceutical equivalents on the national market) and       | - is it implemented in legislation that a pharmacy preparation is not advisable if a pharmaceutical equivalent is available on the national market?                                            |          |
| 3.2. (added value and responsibility of health care professionals) | - are the responsibilities of the preparing pharmacy and the dispensing pharmacy (if these pharmacies are not identical) defined in:<br><br>a/ regulations?<br><br>b/ a contractual agreement? |          |
| 4. (preparation process)                                           | - is GMP applicable for high risk preparations?                                                                                                                                                |          |
| 5. (product dossier)                                               | - are product dossiers, as described in note 2, required for stock preparations?                                                                                                               |          |
| 6. (marketing authorisation)                                       | - has the regulatory authority considered establishing the requirement for obtaining a marketing authorisation for pharmacy preparations?                                                      |          |
| 7. (labelling)                                                     | - is this implemented in your country?                                                                                                                                                         |          |
| 8. (compliance with pharmacopoeial requirements)                   | - is this implemented in your country?                                                                                                                                                         |          |
| 10.1 (authorisation of pharmacies)                                 | - is there an additional authorisation or licence for preparation?                                                                                                                             |          |
| 10.2 (licence for companies)                                       | - in case you have such companies: is a licence for manufacture mandatory for these companies?                                                                                                 |          |
| 11 (transparency and safety)                                       |                                                                                                                                                                                                |          |
| 11.1 (reporting of quality and safety issues)                      | - is there an adequate system for reporting quality and safety issues?<br><br>(please attach)                                                                                                  |          |

|                                              |                                                                                                                                                                                 |  |
|----------------------------------------------|---------------------------------------------------------------------------------------------------------------------------------------------------------------------------------|--|
| 11.2. (notification or announcement system)  | <p>- do you have a notification system concerning the preparation activities performed in each pharmacy?</p> <p>(please attach details)</p>                                     |  |
| 11.5 (surveillance)                          | <p>- does the competent authority performs risk-based inspections? (11.5)</p> <p>(please provide details how this is performed)</p>                                             |  |
| 11.3 (inventory for pharmacy preparations)   | <p>- do you have a national inventory for pharmacy preparations?</p>                                                                                                            |  |
| 13. (Distribution of pharmacy preparations?) | <p>- do pharmacies or companies, preparing medicinal products upon the request of pharmacies, have to comply with good distribution practices (GDP) in your country (13.1)?</p> |  |
|                                              | <p>- does export or import of pharmacy preparations take place in your country (13.2)?</p>                                                                                      |  |
